# Supplementary material for: Revertant Mosaicism in Genodermatoses: Natural Gene Therapy Right before Your Eyes
Source: MDPI journal article supplement (doi:10.3390/biomedicines10092118), 2022-08-29
Supplement: s1 [file s1]

**Table S1.** Genetic conditions in which revertant mosaicism has been reported in other tissues than skin.

| Disease group             | Disease                                                                           | OMIM   | Corrected gene           | OMIM   | References |
|---------------------------|-----------------------------------------------------------------------------------|--------|--------------------------|--------|------------|
| Metabolic                 | Lesch-Nyhan syndrome                                                              | 300322 | <i>HPRT1</i>             | 308000 | [61]       |
| Metabolic                 | Tyrosinemia type I                                                                | 276700 | <i>FAH</i>               | 613871 | [58]       |
| Metabolic                 | Familial amyloidotic polyneuropathy                                               | 105210 | <i>TTR</i>               | 176330 | [36]       |
| Neuromuscular             | Duchenne muscular dystrophy                                                       | 310200 | <i>DMD</i>               | 300377 | [60]       |
| Neuromuscular             | Myotonic dystrophy                                                                | 160900 | <i>DMPK</i>              | 605377 | [59]       |
| Neuromuscular             | Hereditary motor and sensory neuropathy type 1A                                   | 118220 | <i>PMP22 duplication</i> | 601097 | [55]       |
| Neurologic, hematologic   | Ataxia pancytopenia                                                               | 159550 | <i>SAMD9L</i>            | 611170 | [37]       |
| Immunologic               | Adenosine deaminase deficiency                                                    | 102700 | <i>ADA</i>               | 608958 | [56]       |
| Immunologic               | X-linked severe combined immunodeficiency                                         | 300400 | <i>IL2RG</i>             | 308380 | [54]       |
| Immunologic               | Omenn syndrome                                                                    | 603554 | <i>RAG1</i>              | 179615 | [49]       |
| Immunologic               | T-cell immunodeficiency                                                           | 610163 | <i>CD3-zeta (CD247)</i>  | 186780 | [48]       |
| Immunologic               | Leukocyte adhesion deficiency type 1                                              | 116920 | <i>ITGB2</i>             | 600065 | [46]       |
| Immunologic               | Autosomal recessive severe combined immunodeficiency                              | 608971 | <i>IL7R</i>              | 146661 | [42]       |
| Immunologic               | Autosomal recessive severe combined immunodeficiency                              | 600802 | <i>JAK3</i>              | 600173 | [43]       |
| Immunologic               | Hyper-IgE recurrent infection syndrome, autosomal recessive                       | 243700 | <i>DOCK8</i>             | 611432 | [41]       |
| Immunologic               | Omenn syndrome                                                                    | 603554 | <i>CARD11</i>            | 607210 | [40]       |
| Immunologic               | WHIM syndrome                                                                     | 193670 | <i>CXCR4</i>             | 162643 | [38]       |
| Immunologic               | Immunodeficiency 25                                                               | 610163 | <i>CD247</i>             | 186780 | [35]       |
| Immunologic               | X-linked lymphoproliferative syndrome type 1                                      | 308240 | <i>SH2D1A</i>            | 300490 | [28]       |
| Immunologic, dermatologic | X-linked hypohidrotic ectodermal dysplasia with immunodeficiency                  | 300291 | <i>IKBKG</i>             | 300248 | [50]       |
| Hematologic, immunologic  | Wiskott-Aldrich syndrome                                                          | 301000 | <i>WAS</i>               | 300392 | [52]       |
| Hematologic, immunologic  | Bone marrow failure syndrome 4                                                    | 618116 | <i>MYSM1</i>             | 612176 | [39]       |
| Hematologic, immunologic  | Platelet-abnormalities with eosinophilia and immune-mediated inflammatory disease | 617718 | <i>ARPC1B</i>            | 604223 | [31]       |
| Hematologic               | Fanconi anemia, complementation group C                                           | 227645 | <i>FANCC</i>             | 613899 | [53]       |
| Hematologic               | Fanconi anemia, complementation group A                                           | 227650 | <i>FANCA</i>             | 607139 | [51]       |
| Hematologic               | Fanconi anemia, complementation group N                                           | 610832 | <i>PALB2</i>             | 610355 | [45]       |
| Hematologic               | Fanconi anemia, complementation group I                                           | 609053 | <i>FANCI</i>             | 611360 | [47]       |
| Hematologic               | Diamond-Blackfan anemia 10                                                        | 603701 | <i>RPS26</i>             | 613309 | [33]       |
| Hematologic               | Monosomy 7 myelodysplasia and leukemia syndrome                                   | 252270 | <i>SAMD9L</i>            | 611170 | [34]       |

|                           |                                              |        |               |        |      |
|---------------------------|----------------------------------------------|--------|---------------|--------|------|
| Hematologic               | Fanconi anemia, complementation group B      | 300514 | <i>FANCB</i>  | 300515 | [32] |
| Hematologic               | Diamond-Blackfan anemia 1                    | 105650 | <i>RPS19</i>  | 603474 | [29] |
| Hematologic, dermatologic | Dyskeratosis congenita, autosomal dominant 1 | 127550 | <i>TERC</i>   | 602322 | [44] |
| Multi-system              | Bloom syndrome                               | 210900 | <i>RECQL3</i> | 604610 | [57] |
| Multi-system              | MIRAGE syndrome                              | 617053 | <i>SAMD9</i>  | 610456 | [30] |
| Multi-system              | Shwachman-Diamond syndrome                   | 260400 | <i>SBDS</i>   | 607444 | [27] |
